# Supplementary material for: Population Structure of a Worldwide Collection of Tropical Japonica Rice Indicates Limited Geographic Differentiation and Shows Promising Genetic Variability Associated with New Plant Type
Source: MDPI journal article supplement (doi:10.3390/genes13030484), 2022-03-09

**Supplementary Table S1.** List of the 200 tropical japonica genotypes and checks with their pedigree.

| S. No. | Accession | Variety/ Pedigree     | Sub-type                 | Source Country | Status                                                                              |
|--------|-----------|-----------------------|--------------------------|----------------|-------------------------------------------------------------------------------------|
| 1      | IRGC289   | Azmil 85              | Tropical <i>japonica</i> | Philippines    | Landraces/Traditional cultivar<br>Breeding and inbred lines<br>released cultivar    |
| 2      | IRGC328   | Azucena               | Tropical <i>japonica</i> | Philippines    |                                                                                     |
| 3      | IRGC7486  | Upland                | Tropical <i>japonica</i> | Ponape Island  |                                                                                     |
| 4      | IRGC7756  | Vegold                | Tropical <i>japonica</i> | United State   |                                                                                     |
| 5      | IRGC8193  | Poenot Hitam          | Tropical <i>japonica</i> | Indonesia      | Breeding and inbred lines<br>Landraces/Traditional cultivar                         |
| 6      | IRGC3255  | Mojito Colorado       | Tropical <i>japonica</i> | Bolivia        |                                                                                     |
| 7      | IRGC3223  | Kara Celtik Tohuma    | Tropical <i>japonica</i> | Turkey         |                                                                                     |
| 8      | IRGC15147 | 62-667                | Tropical <i>japonica</i> | Ivory coast    |                                                                                     |
| 9      | IRGC1797  | Tewax Patna           | Tropical <i>japonica</i> | United State   | Breeding and inbred lines                                                           |
| 10     | IRGC5320  | Yakumo                | Tropical <i>japonica</i> | Japan          |                                                                                     |
| 11     | IRGC4059  | STG556011             | Tropical <i>japonica</i> | United State   |                                                                                     |
| 12     | IRGC3849  | Kinstano              | Tropical <i>japonica</i> | Philippines    |                                                                                     |
| 13     | IRGC3764  | Assy Y-Pung           | Tropical <i>japonica</i> | Philippines    | Breeding and inbred lines                                                           |
| 14     | IRGC3408  | Ghirgua 1 I-22        | Tropical <i>japonica</i> | Venezuela      |                                                                                     |
| 15     | IRGC3394  | Wanica                | Tropical <i>japonica</i> | Suriname       |                                                                                     |
| 16     | IRGC3370  | Boa Vista             | Tropical <i>japonica</i> | El Salvador    |                                                                                     |
| 17     | IRGC2263  | Se Zic Slen (CI12289) | Tropical <i>japonica</i> | South Korea    | Breeding and inbred lines<br>Released/Improved cultivar                             |
| 18     | IRGC5769  | Delitus               | Tropical <i>japonica</i> | France         |                                                                                     |
| 19     | IRGC10365 | Delrex                | Tropical <i>japonica</i> | United State   |                                                                                     |
| 20     | IRGC6309  | Nira                  | Tropical <i>japonica</i> | United State   |                                                                                     |
| 21     | IRGC6457  | Elliott               | Tropical <i>japonica</i> | Liberia        | Breeding and inbred lines<br>Breeding and inbred lines<br>Breeding and inbred lines |
| 22     | IRGC5441  | 1643822               | Tropical <i>japonica</i> | Unknown        |                                                                                     |
| 23     | IRGC5097  | Palmira               | Tropical <i>japonica</i> | Costa Rica     |                                                                                     |
| 24     | IRGC4122  | Iguape Cateto         | Tropical <i>japonica</i> | Haiti          |                                                                                     |
| 25     | IRGC8196  | Karasukara Surankasu  | Tropical <i>japonica</i> | Taiwan         | Landraces/Traditional cultivar<br>Landraces/Traditional cultivar                    |
| 26     | IRGC8261  | Padi Kasalle          | Tropical <i>japonica</i> | Indonesia      |                                                                                     |
| 27     | IRGC8244  | Davao                 | Tropical <i>japonica</i> | Philippines    |                                                                                     |
| 28     | IRGC8269  | Nabeshi               | Tropical <i>japonica</i> | Taiwan         |                                                                                     |
| 29     | IRGC8146  | Saba                  | Tropical <i>japonica</i> | Philippines    |                                                                                     |
| 30     | IRGC2245  | Sanhyang Daeme        | Tropical <i>japonica</i> | South Korea    |                                                                                     |

| S. No. | Accession | Variety/ Pedigree        | Sub-type                 | Source Country   | Status                         |
|--------|-----------|--------------------------|--------------------------|------------------|--------------------------------|
| 31     | IRGC10758 | Portachuelo              | Tropical <i>japonica</i> | Bolivia          | Landraces/Traditional cultivar |
| 32     | IRGC2455  | Wataibune                | Tropical <i>japonica</i> | Japan            | Breeding and inbred lines      |
| 33     | IRGC10760 | 583                      | Tropical <i>japonica</i> | Ecuador          | Breeding and inbred lines      |
| 34     | IRGC11010 | Maintimolosty            | Tropical <i>japonica</i> | Madagascar       | Released/Improved cultivar     |
| 35     | IRGC11108 | CI7787                   | Tropical <i>japonica</i> | United State     | Breeding and inbred lines      |
| 36     | IRGC11169 | Bakaw                    | Tropical <i>japonica</i> | Philippines      | Landraces/Traditional cultivar |
| 37     | IRGC11336 | OS6                      | Tropical <i>japonica</i> | Zaire            | Released/Improved cultivar     |
| 38     | IRGC11444 | Tchibanga                | Tropical <i>japonica</i> | Gabon            | Landraces/Traditional cultivar |
| 39     | IRGC11821 | Peek                     | Tropical <i>japonica</i> | Laos             |                                |
| 40     | IRGC12052 | Bomalasang               | Tropical <i>japonica</i> | Philippines      | Landraces/Traditional cultivar |
| 41     | IRGC13496 | C 8434                   | Tropical <i>japonica</i> | Papua New Guinea | Landraces/Traditional cultivar |
| 42     | IRGC14529 | Della                    | Tropical <i>japonica</i> | United State     | Released/Improved cultivar     |
| 43     | IRGC14530 | Vista                    | Tropical <i>japonica</i> | United State     | Released/Improved cultivar     |
| 44     | IRGC14694 | Uchuti                   | Tropical <i>japonica</i> | Kenya            | Landraces/Traditional cultivar |
| 45     | IRGC14725 | 63-83                    | Tropical <i>japonica</i> | Ivory coast      | Released/Improved cultivar     |
| 46     | IRGC14738 | Kwadwo                   | Tropical <i>japonica</i> | Ghana            |                                |
| 47     | IRGC14779 | Warabehatomochi          | Tropical <i>japonica</i> | Japan            |                                |
| 48     | IRGC14791 | Gogowierie               | Tropical <i>japonica</i> | Suriname         | Landraces/Traditional cultivar |
| 49     | IRGC14917 | 280                      | Tropical <i>japonica</i> | Liberia          |                                |
| 50     | IRGC15006 | Khaohahng                | Tropical <i>japonica</i> | Thailand         | Landraces/Traditional cultivar |
| 51     | IRGC15023 | Lai                      | Tropical <i>japonica</i> | Thailand         | Landraces/Traditional cultivar |
| 52     | IRGC15046 | Jao                      | Tropical <i>japonica</i> | Thailand         | Landraces/Traditional cultivar |
| 53     | IRGC15073 | R53-157                  | Tropical <i>japonica</i> | Zaire            |                                |
| 54     | IRGC15092 | RT1031-69                | Tropical <i>japonica</i> | Zaire            |                                |
| 55     | IRGC15100 | 63-104                   | Tropical <i>japonica</i> | Ivory coast      |                                |
| 56     | IRGC16073 | Pate Balnce MN1          | Tropical <i>japonica</i> | Ivory coast      | Released/Improved cultivar     |
| 57     | IRGC10658 | Cuba 65                  | Tropical <i>japonica</i> | Cuba             | Landraces/Traditional cultivar |
| 58     | IRGC8182  | Malagkit Pirurutong      | Tropical <i>japonica</i> | Philippines      |                                |
| 59     | IRGC5726  | Rikuto Tauki Mochi 27    | Tropical <i>japonica</i> | Japan            |                                |
| 60     | IRGC5766  | Pato De Gallinazo Y 5371 | Tropical <i>japonica</i> | Australia        | Breeding and inbred lines      |
| 61     | IRGC2052  | Gulfrose                 | Tropical <i>japonica</i> | United State     | Breeding and inbred lines      |
| 62     | IRGC10739 | PI 303646                | Tropical <i>japonica</i> | Honduras         | Landraces/Traditional cultivar |

| S. No. | Accession | Variety/ Pedigree           | Sub-type                 | Source Country | Status                         |
|--------|-----------|-----------------------------|--------------------------|----------------|--------------------------------|
| 63     | IRGC137   | Sunbonnet                   | Tropical <i>japonica</i> | United State   | Released/Improved cultivar     |
| 64     | IRGC1220  | PI 160615                   | Tropical <i>japonica</i> | China          | Landraces/Traditional cultivar |
| 65     | IRGC1723  | Carolina Gold               | Tropical <i>japonica</i> | United State   |                                |
| 66     | IRGC23385 | Khao Dam                    | Tropical <i>japonica</i> | Laos           |                                |
| 67     | IRGC6937  | Penn L Gopher LG            | Tropical <i>japonica</i> | United State   | Breeding and inbred lines      |
| 68     | IRGC1972  | Rexark rogue                | Tropical <i>japonica</i> | United State   | Breeding and inbred lines      |
| 69     | IRGC1724  | Carolina Gold Seln          | Tropical <i>japonica</i> | United State   |                                |
| 70     | IRGC1739  | Sup Blue Rose               | Tropical <i>japonica</i> | United State   |                                |
| 71     | IRGC1742  | Edith                       | Tropical <i>japonica</i> | United State   |                                |
| 72     | IRGC1761  | Lady Wright Seln (CI 12187) | Tropical <i>japonica</i> | United State   | Breeding and inbred lines      |
| 73     | IRGC1819  | Nato                        | Tropical <i>japonica</i> | United State   | Breeding and inbred lines      |
| 74     | IRGC1789  | Arkrose                     | Tropical <i>japonica</i> | United State   | Released/Improved cultivar     |
| 75     | IRGC1790  | Prelude                     | Tropical <i>japonica</i> | United State   | Released/Improved cultivar     |
| 76     | IRGC16081 | Gbante                      | Tropical <i>japonica</i> | Ivory coast    |                                |
| 77     | IRGC17052 | Chuan 4                     | Tropical <i>japonica</i> | Taiwan         |                                |
| 78     | IRGC17051 | Chuan 3                     | Tropical <i>japonica</i> | Taiwan         |                                |
| 79     | IRGC16449 | Ketan Gondomono             | Tropical <i>japonica</i> | Indonesia      | Landraces/Traditional cultivar |
| 80     | IRGC17906 | Ketan Lambu                 | Tropical <i>japonica</i> | Indonesia      | Landraces/Traditional cultivar |
| 81     | IRGC19462 | Miano                       | Tropical <i>japonica</i> | Philippines    | Landraces/Traditional cultivar |
| 82     | IRGC18936 | Sukaradja                   | Tropical <i>japonica</i> | Indonesia      | Landraces/Traditional cultivar |
| 83     | IRGC18425 | Palembang Kuning            | Tropical <i>japonica</i> | Indonesia      | Landraces/Traditional cultivar |
| 84     | IRGC1822  | CI 89999                    | Tropical <i>japonica</i> | United State   | Breeding and inbred lines      |
| 85     | IRGC19919 | Ligerito (CortoPubescente)  | Tropical <i>japonica</i> | Colombia       | Landraces/Traditional cultivar |
| 86     | IRGC23364 | Kinandang Patong            | Tropical <i>japonica</i> | Philippines    | Landraces/Traditional cultivar |
| 87     | IRGC24275 | Lebonnet                    | Tropical <i>japonica</i> | United State   | Released/Improved cultivar     |
| 88     | IRGC18021 | Koruring                    | Tropical <i>japonica</i> | Indonesia      | Landraces/Traditional cultivar |
| 89     | IRGC22712 | IAC120                      | Tropical <i>japonica</i> | Brazil         | Released/Improved cultivar     |
| 90     | IRGC8266  | Peh-Pi-Nuo                  | Tropical <i>japonica</i> | China          |                                |
| 91     | IRGC65646 | Arroz Cebada                | Tropical <i>japonica</i> | Venezuela      | Breeding and inbred lines      |
| 92     | IRGC64935 | Tschinanangka               | Tropical <i>japonica</i> | Bhutan         | Landraces/Traditional cultivar |
| 93     | IRGC64914 | Naam                        | Tropical <i>japonica</i> | Bhutan         | Landraces/Traditional cultivar |
| 94     | IRGC64911 | Maap                        | Tropical <i>japonica</i> | Bhutan         | Landraces/Traditional cultivar |

| S. No. | Accession | Variety/ Pedigree  | Sub-type                 | Source Country | Status                         |
|--------|-----------|--------------------|--------------------------|----------------|--------------------------------|
| 95     | IRGC64897 | Jana (Nam)         | Tropical <i>japonica</i> | Bhutan         | Landraces/Traditional cultivar |
| 96     | IRGC64896 | Gunja              | Tropical <i>japonica</i> | Bhutan         | Landraces/Traditional cultivar |
| 97     | IRGC64888 | Dakpa              | Tropical <i>japonica</i> | Bhutan         | Landraces/Traditional cultivar |
| 98     | IRGC64887 | Dagpa Bara         | Tropical <i>japonica</i> | Bhutan         | Landraces/Traditional cultivar |
| 99     | IRGC64858 | Dechangbyeo        | Tropical <i>japonica</i> | South Korea    |                                |
| 100    | IRGC64763 | LG2                | Tropical <i>japonica</i> | Philippines    |                                |
| 101    | IRGC64657 | Newrex             | Tropical <i>japonica</i> | United State   | Released/Improved cultivar     |
| 102    | IRGC64656 | Bellemont          | Tropical <i>japonica</i> | United State   | Breeding and inbred lines      |
| 103    | IRGC66761 | Toro 2             | Tropical <i>japonica</i> | United State   | Released/Improved variety      |
| 104    | IRGC71559 | Lompug             | Tropical <i>japonica</i> | Malaysia       | Landraces/Traditional cultivar |
| 105    | IRGC71544 | Kulob              | Tropical <i>japonica</i> | Malaysia       | Landraces/Traditional cultivar |
| 106    | IRGC71511 | Bokukot            | Tropical <i>japonica</i> | Malaysia       | Landraces/Traditional cultivar |
| 107    | IRGC71493 | Angkarong          | Tropical <i>japonica</i> | Malaysia       | Landraces/Traditional cultivar |
| 108    | IRGC69911 | Vary Malady        | Tropical <i>japonica</i> | Madagascar     | Landraces/Traditional cultivar |
| 109    | IRGC69910 | Vary Mainty        | Tropical <i>japonica</i> | Madagascar     | Landraces/Traditional cultivar |
| 110    | IRGC69861 | Mananelatra        | Tropical <i>japonica</i> | Madagascar     | Landraces/Traditional cultivar |
| 111    | IRGC69857 | Lohambitro         | Tropical <i>japonica</i> | Madagascar     | Landraces/Traditional cultivar |
| 112    | IRGC69845 | Bengiza            | Tropical <i>japonica</i> | Madagascar     | Landraces/Traditional cultivar |
| 113    | IRGC69708 | Krampa White       | Tropical <i>japonica</i> | Ghana          | Landraces/Traditional cultivar |
| 114    | IRGC69367 | Latsika            | Tropical <i>japonica</i> | Madagascar     | Landraces/Traditional cultivar |
| 115    | IRGC68799 | MUT. IAC 25-44-807 | Tropical <i>japonica</i> | Guyana         |                                |
| 116    | IRGC67846 | Ondeykam           | Tropical <i>japonica</i> | Bhutan         | Landraces/Traditional cultivar |
| 117    | IRGC67614 | Batukuru Wee       | Tropical <i>japonica</i> | Srilanka       | Landraces/Traditional cultivar |
| 118    | IRGC67437 | Inuway             | Tropical <i>japonica</i> | Philippines    | Landraces/Traditional cultivar |
| 119    | IRGC66755 | Bond               | Tropical <i>japonica</i> | United State   | Released/Improved variety      |
| 120    | IRGC66745 | Ple Seet See       | Tropical <i>japonica</i> | Thailand       |                                |
| 121    | IRGC26872 | Binulawan          | Tropical <i>japonica</i> | Philippines    | Landraces/Traditional cultivar |
| 122    | IRGC31063 | D 4-148            | Tropical <i>japonica</i> | Liberia        | Landraces/Traditional cultivar |
| 123    | IRGC26178 | Star Bonnet        | Tropical <i>japonica</i> | Brazil         | Breeding and inbred lines      |
| 124    | IRGC25966 | Cana Roxa          | Tropical <i>japonica</i> | Brazil         |                                |
| 125    | IRGC25892 | Mikhudeb           | Tropical <i>japonica</i> | Bangladesh     | Landraces/Traditional cultivar |
| 126    | IRGC25759 | Sipulut Brastagi   | Tropical <i>japonica</i> | Indonesia      | Landraces/Traditional cultivar |

| S. No. | Accession | Variety/ Pedigree | Sub-type                 | Source Country | Status                         |
|--------|-----------|-------------------|--------------------------|----------------|--------------------------------|
| 127    | IRGC25239 | Ndowatu           | Tropical <i>japonica</i> | Indonesia      | Landraces/Traditional cultivar |
| 128    | IRGC25510 | Padi Kompai       | Tropical <i>japonica</i> | Indonesia      | Landraces/Traditional cultivar |
| 129    | IRGC25554 | Pedi Teras        | Tropical <i>japonica</i> | Indonesia      | Landraces/Traditional cultivar |
| 130    | IRGC25660 | Selem Gampil      | Tropical <i>japonica</i> | Indonesia      | Landraces/Traditional cultivar |
| 131    | IRGC66758 | Pecos             | Tropical <i>japonica</i> | United State   | Released/Improved variety      |
| 132    | IRGC66578 | Lekat Hitam       | Tropical <i>japonica</i> | Indonesia      | Landraces/Traditional cultivar |
| 133    | IRGC67428 | Binabae (GULT.)   | Tropical <i>japonica</i> | Philippines    | Landraces/Traditional cultivar |
| 134    | IRGC61841 | Na Gui Zhan Gu    | Tropical <i>japonica</i> | China          |                                |
| 135    | IRGC57692 | Kosagi            | Tropical <i>japonica</i> | Guinea         | Landraces/Traditional cultivar |
| 136    | IRGC62156 | Balingmi          | Tropical <i>japonica</i> | Bhutan         | Landraces/Traditional cultivar |
| 137    | IRGC62162 | Botpa Bara        | Tropical <i>japonica</i> | Bhutan         | Landraces/Traditional cultivar |
| 138    | IRGC63265 | Gbuapu1           | Tropical <i>japonica</i> | Sierra Leone   | Landraces/Traditional cultivar |
| 139    | IRGC62952 | PL5068-24         | Tropical <i>japonica</i> | China          |                                |
| 140    | IRGC62171 | Kamja             | Tropical <i>japonica</i> | Bhutan         | Landraces/Traditional cultivar |
| 141    | IRGC63121 | Bakilikanda       | Tropical <i>japonica</i> | Zimbabwe       | Landraces/Traditional cultivar |
| 142    | IRGC57781 | Bossa             | Tropical <i>japonica</i> | Guinea         | Landraces/Traditional cultivar |
| 143    | IRGC66759 | Sky Bonnet        | Tropical <i>japonica</i> | United State   | Relseae/Improved variety       |
| 144    | IRGC66760 | Tebonnet          | Tropical <i>japonica</i> | United State   | Relseae/Improved variety       |
| 145    | IRGC64189 | Ludan             | Tropical <i>japonica</i> | Philippines    | Landraces/Traditional cultivar |
| 146    | IRGC66652 | Sila Gara         | Tropical <i>japonica</i> | Indonesia      | Landraces/Traditional cultivar |
| 147    | IRGC66756 | Lemont            | Tropical <i>japonica</i> | United State   | Relseae/Improved variety       |
| 148    | IRGC66644 | Sifarasi          | Tropical <i>japonica</i> | Indonesia      | Landraces/Traditional cultivar |
| 149    | IRGC66630 | Sahulo Fache Soyo | Tropical <i>japonica</i> | Indonesia      | Landraces/Traditional cultivar |
| 150    | IRGC66529 | Podi Niyan Wee    | Tropical <i>japonica</i> | Srilanka       | Landraces/Traditional cultivar |
| 151    | IRGC50399 | Namol             | Tropical <i>japonica</i> | Philippines    | Landraces/Traditional cultivar |
| 152    | IRGC48960 | 44-09/79/049      | Tropical <i>japonica</i> | Indonesia      | Landraces/Traditional cultivar |
| 153    | IRGC48733 | Ketan Menah       | Tropical <i>japonica</i> | Indonesia      | Landraces/Traditional cultivar |
| 154    | IRGC48493 | 571               | Tropical <i>japonica</i> | Thailand       | Landraces/Traditional cultivar |
| 155    | IRGC47345 | Tapungol (White)  | Tropical <i>japonica</i> | Philippines    | Landraces/Traditional cultivar |
| 156    | IRGC47248 | Kinyo             | Tropical <i>japonica</i> | Philippines    | Landraces/Traditional cultivar |
| 157    | IRGC43394 | Gogolempuk        | Tropical <i>japonica</i> | Indonesia      | Landraces/Traditional cultivar |
| 158    | IRGC43372 | Cicih Beton       | Tropical <i>japonica</i> | Indonesia      | Landraces/Traditional cultivar |

| S. No. | Accession | Variety/ Pedigree  | Sub-type                 | Source Country | Status                         |
|--------|-----------|--------------------|--------------------------|----------------|--------------------------------|
| 159    | IRGC43343 | Beaq Penyalin      | Tropical <i>japonica</i> | Indonesia      | Landraces/Traditional cultivar |
| 160    | IRGC40199 | Lek                | Tropical <i>japonica</i> | Thailand       | Landraces/Traditional cultivar |
| 161    | IRGC38994 | Bicobranco         | Tropical <i>japonica</i> | Brazil         |                                |
| 162    | IRGC35724 | Ketan Enger        | Tropical <i>japonica</i> | Indonesia      | Landraces/Traditional cultivar |
| 163    | IRGC34018 | CP231              | Tropical <i>japonica</i> | United State   |                                |
| 164    | IRGC32411 | Gemjya Jyanam      | Tropical <i>japonica</i> | Bhutan         | Landraces/Traditional cultivar |
| 165    | IRGC32406 | Yangkum (Red)      | Tropical <i>japonica</i> | Bhutan         | Landraces/Traditional cultivar |
| 166    | IRGC32389 | Dawasam (Red)      | Tropical <i>japonica</i> | Bhutan         | Landraces/Traditional cultivar |
| 167    | IRGC32388 | Dangrey            | Tropical <i>japonica</i> | Bhutan         | Landraces/Traditional cultivar |
| 168    | IRGC32301 | Gerdeh             | Tropical <i>japonica</i> | Iran           | Landraces/Traditional cultivar |
| 169    | IRGC31051 | D 4-136            | Tropical <i>japonica</i> | Liberia        | Landraces/Traditional cultivar |
| 170    | IRGC30358 | Inpong             | Tropical <i>japonica</i> | Laos           | Landraces/Traditional cultivar |
| 171    | IRGC30921 | D 1-177            | Tropical <i>japonica</i> | Liberia        | Landraces/Traditional cultivar |
| 172    | IRGC30751 | Korr               | Tropical <i>japonica</i> | Liberia        |                                |
| 173    | IRGC27435 | Pulut Todopi       | Tropical <i>japonica</i> | Indonesia      | Landraces/Traditional cultivar |
| 174    | IRGC27321 | PaeUra             | Tropical <i>japonica</i> | Indonesia      | Landraces/Traditional cultivar |
| 175    | IRGC27129 | Gundil Kuning      | Tropical <i>japonica</i> | Indonesia      |                                |
| 176    | IRGC27116 | Cina               | Tropical <i>japonica</i> | Indonesia      |                                |
| 177    | IRGC24275 | Lebonnet           | Tropical <i>japonica</i> | United State   | Released/Improved cultivar     |
| 178    | IRGC24528 | Bonnet 73          | Tropical <i>japonica</i> | United State   | Released/Improved cultivar     |
| 179    | IRGC24977 | Ketan Mehrah       | Tropical <i>japonica</i> | Indonesia      |                                |
| 180    | IRGC6741  | B 505 A 1-28-7-1-2 | Tropical <i>japonica</i> | United State   | Breeding and inbred lines      |
| 181    | IRGC19922 | Miramono           | Tropical <i>japonica</i> | Colombia       | Landraces/Traditional cultivar |
| 182    | IRGC24274 | Labelle            | Tropical <i>japonica</i> | United State   | Released/Improved cultivar     |
| 183    | IRGC24273 | Brazos             | Tropical <i>japonica</i> | United State   | Released/Improved cultivar     |
| 184    | IRGC23754 | Ma Hae             | Tropical <i>japonica</i> | Thailand       | Landraces/Traditional cultivar |
| 185    | IRGC56812 | Vasse Nanan        | Tropical <i>japonica</i> | Ivory coast    |                                |
| 186    | IRGC56735 | Keren Fenho        | Tropical <i>japonica</i> | Guinea-Bissau  | Landraces/Traditional cultivar |
| 187    | IRGC56704 | Nouakpo            | Tropical <i>japonica</i> | Ivory coast    | Landraces/Traditional cultivar |
| 188    | IRGC56698 | Morofin            | Tropical <i>japonica</i> | Ivory coast    | Landraces/Traditional cultivar |
| 189    | IRGC56017 | CRM360-37-8        | Tropical <i>japonica</i> | Italy          | Breeding and inbred lines      |
| 190    | IRGC55860 | IAC164             | Tropical <i>japonica</i> | Brazil         | Released/Improved cultivar     |

| S. No. | Accession        | Variety/ Pedigree       | Sub-type                 | Source Country | Status                         |
|--------|------------------|-------------------------|--------------------------|----------------|--------------------------------|
| 191    | IRGC55808        | Oriente 10              | Tropical <i>japonica</i> | Ecuador        | Released/Improved cultivar     |
| 192    | IRGC55403        | Tabuno (White)          | Tropical <i>japonica</i> | Philippines    | Landraces/Traditional cultivar |
| 193    | IRGC54333        | Pare Toro               | Tropical <i>japonica</i> | Indonesia      | Landraces/Traditional cultivar |
| 194    | IRGC54203        | Ketan Genca Rasi        | Tropical <i>japonica</i> | Indonesia      | Landraces/Traditional cultivar |
| 195    | IRGC54201        | Ketan Donggo            | Tropical <i>japonica</i> | Indonesia      | Landraces/Traditional cultivar |
| 196    | IRGC53089        | Palmyra                 | Tropical <i>japonica</i> | United State   | Released/Improved cultivar     |
| 197    | IRGC5390         | Kibi-Ho                 | Tropical <i>japonica</i> | Japan          |                                |
| 198    | IRGC53087        | Nova 6                  | Tropical <i>japonica</i> | United State   | Released/Improved cultivar     |
| 199    | IRGC51498        | 78-48                   | Tropical <i>japonica</i> | China          |                                |
| 200    | IRGC23754        | Ma Hae                  | Tropical <i>japonica</i> | Thailand       | Landraces/Traditional cultivar |
| 201    | PR 106           | IR8 /Peta 5             | <i>indica</i>            | India          | Cultivar                       |
| 202    | PUSA44           | IARI5901-2/ IR8         | <i>indica</i>            | India          | Cultivar                       |
| 203    | PAU201           | PR103/ PAU1126          | <i>indica</i>            | India          | Cultivar                       |
| 204    | MTU1010          | Krishnaveni / IR64      | <i>indica</i>            | India          | Cultivar                       |
| 205    | PS5              | Pusa 3A/Haryana Basmati | <i>indica</i>            | India          | Cultivar                       |
| 206    | WGL14            | BPT5204/ARC5984/BPT3291 | <i>indica</i>            | India          | Cultivar                       |
| 207    | BPT5204          | GEB 24/ TN1/ Mahsuri    | <i>indica</i>            | India          | Cultivar                       |
| 208    | SWARNA           | Vasista/Mahsuri         | <i>indica</i>            | India          | Cultivar                       |
| 209    | CO39             | CUL340/ Kannagi         | <i>indica</i>            | India          | Cultivar                       |
| 210    | Intan            | -                       | <i>indica</i>            | India          |                                |
| 211    | Ezhome1          | Jaya/ Kuthiru           | <i>indica</i>            | India          | Cultivar                       |
| 212    | Kuthiru          | -                       | <i>indica</i>            | India          | Landraces/Traditional cultivar |
| 213    | Orkayama         | -                       | <i>indica</i>            | India          | Landraces/Traditional cultivar |
| 214    | Bhogali Bora     | -                       | <i>indica</i>            | India          | Landraces/Traditional cultivar |
| 215    | Karuna           | Co25/ H4                | <i>indica</i>            | India          |                                |
| 216    | Vaishakh         | -                       | <i>indica</i>            | India          |                                |
| 217    | Vandana          | C22/ Kalakeri           | <i>aus</i>               | India          |                                |
| 218    | Dular            | -                       | <i>aus</i>               | India          | Landraces/Traditional cultivar |
| 219    | Abhishek         | Mut CR314-5-10          | <i>aus</i>               | India          |                                |
| 220    | N22              | Selection from Rajbhog  | <i>aus</i>               | India          |                                |
| 221    | Pusa Basmati1121 | Pusa 150/ Karnal Local  | <i>Basmati</i>           | India          |                                |
| 222    | Taraori Basmati  | Pureline selection      | <i>Basmati</i>           | India          |                                |

| S. No. | Accession         | Variety/ Pedigree | Sub-type      | Source Country | Status                         |
|--------|-------------------|-------------------|---------------|----------------|--------------------------------|
| 223    | Pusa Basmati 1509 | PB 1121/ PB 1301  | Basmati       | India          |                                |
| 224    | Kal Brar          | -                 | <i>indica</i> | India          | Landraces/Traditional cultivar |
| 225    | Kew               | -                 | <i>indica</i> | India          | Landraces/Traditional cultivar |
| 226    | Rahmann Batti P   | -                 | <i>indica</i> | India          | Landraces/Traditional cultivar |
| 227    | Sona Khao         | -                 | <i>indica</i> | India          | Landraces/Traditional cultivar |
| 228    | Khao Dachkrai     | -                 | <i>indica</i> | India          | Landraces/Traditional cultivar |
| 229    | Khao Khao         | -                 | <i>indica</i> | India          | Landraces/Traditional cultivar |
| 230    | Tompha Khao       | -                 | <i>indica</i> | India          | Landraces/Traditional cultivar |
| 231    | WL11              | -                 | <i>Wild</i>   | India          | Wild                           |
| 232    | WL12              | -                 | <i>Wild</i>   | India          | Wild                           |
| 233    | WL20              | -                 | <i>Wild</i>   | India          | Wild                           |
| 234    | WL27              | -                 | <i>Wild</i>   | India          | Wild                           |
| 235    | WL32              | -                 | <i>Wild</i>   | India          | Wild                           |
| 236    | WL40              | -                 | <i>Wild</i>   | India          | Wild                           |



**Supplementary Table S2.** List of 50 standard SSR primers used for genetic diversity analysis

| Marker | Chr. | Physical<br>Position<br>(Mb) | Forward Primer         | Reverse Primer         | Anneal<br>temp. °c |
|--------|------|------------------------------|------------------------|------------------------|--------------------|
| RM495  | 1    | 213775                       | AATCCAAGGTGCAGAGATGG   | CAACGATGACGAACACAACC   | 55                 |
| RM1    | 1    | 4633595                      | GCGAAAACACAATGCAAAAA   | GCGTTGGTTGGACCTGAC     | 55                 |
| RM283  | 1    | 4883717                      | GTCTACATGTACCCTTGTTGGG | CGGCATGAGAGTCTGTGATG   | 61                 |
| RM259  | 1    | 7443424                      | TGGAGTTTGAGAGGAGGG     | CTTGTTGCATGGTGCCATGT   | 55                 |
| RM312  | 1    | 14890771                     | GTATGCATATTTGATAAGAG   | AAGTCACCGAGTTTACCTTC   | 55                 |
| RM5    | 1    | 23952076                     | TGCAACTTCTAGCTGCTCGA   | GCATCCGATCTTGATGGG     | 57                 |
| RM237  | 1    | 26795365                     | CAAATCCCGACTGCTGTCC    | TGGGAAGAGAGCACTACAGC   | 55                 |
| RM431  | 1    | 38874702                     | TCCTGCGAACTGAAGAGTTG   | AGAGCAAAACCCTGGTTCAC   | 55                 |
| RM154  | 2    | 1083895                      | ACCCTCTCCGCCTCGCCTCCTC | CTCCTCCTCCTGCGACCGCTCC | 61                 |
| RM452  | 2    | 9564377                      | CTGATCGAGAGCGTTAAGGG   | GGGATCAAACCACGTTTCTG   | 61                 |
| RM489  | 3    | 4316348                      | ACTTGAGACGATCGGACACC   | TCACCCATGGATGTTGTCAG   | 55                 |
| OSR13  | 3    | 7109988                      | CATTTGTGCGTCACGGAGTA   | AGCCACAGCGCCCATCTCTC   | 53                 |
| RM338  | 3    | 13210600                     | CACAGGAGCAGGAGAAGAGC   | GGCAAACCGATCACTCAGTC   | 55                 |
| RM55   | 3    | 29002484                     | CCGTCGCCGTAGTAGAGAAG   | TCCCGGTTATTTTAAGGCG    | 55                 |
| RM514  | 3    | 35229618                     | AGATTGATCTCCATTCCCC    | CACGAGCATATTACTAGTGG   | 55                 |
| RM307  | 4    | 12979675                     | GTACTACCGACCTACCGTTCAC | CTGCTATGCATGAACTGCTC   | 55                 |
| RM124  | 4    | 34485157                     | ATCGTCTGCGTTGCGGCTGCTG | CATGGATCACCGAGCTCCCCC  | 67                 |
| RM507  | 5    | 71397                        | CTTAAGCTCCAGCCGAAATG   | CTCACCTCATCATCGCC      | 55                 |
| RM413  | 5    | 2181391                      | GGCGATTCTTGGATGAAGAG   | TCCCCACCAATCTTGTCTTC   | 53                 |
| RM161  | 5    | 20714463                     | TGCAGATGAGAAGCGGCGCCTC | TGTGTCATCAGACGGCGCTCCG | 61                 |
| RM178  | 5    | 24923084                     | TCGCGTGAAAGATAAGCGGCGC | GATCACCGTTCCCTCCGCCTGC | 69                 |
| RM334  | 5    | 28285978                     | GTTCAAGTGTTCAGTGCCACC  | GACTTTGATCTTTGGTGGACG  | 55                 |
| RM133  | 6    | 226944                       | TTGGATTGTTTTGCTGGCTCGC | GGAACACGGGGTCGGAAGCGAC | 63                 |
| RM510  | 6    | 2831513                      | AACCGGATTAGTTTCTCGCC   | TGAGGACGACGAGCAGATTC   | 57                 |
| RM454  | 6    | 23336824                     | CTCAAGCTTAGCTGCTGCTG   | GTGATCAGTGCACCATAGCG   | 55                 |
| RM162  | 6    | 23991705                     | GCCAGCAAAACCAGGGATCCGG | CAAGGTCTTGTGCGGCTTGCGG | 61                 |
| RM11   | 7    | 19256213                     | TCTCCTCTTCCCCCGATC     | ATAGCGGGCGAGGCTTAG     | 55                 |
| RM455  | 7    | 22349919                     | AACAACCCACCACCTGTCTC   | AGAAGGAAAAGGGCTCGATC   | 57                 |

| Marker | Chr. | Physical<br>Position<br>(Mb) | Forward Primer         | Reverse Primer               | Anneal<br>temp. °c |
|--------|------|------------------------------|------------------------|------------------------------|--------------------|
| RM118  | 7    | 26635903                     | CCAATCGGAGCCACCGGAGAGC | CACATCCTCCAGCGACGCCGAG       | 67                 |
| RM408  | 8    | 119935                       | CAACGAGCTAACTTCCGTCC   | ACTGCTACTTGGGTAGCTGACC       | 55                 |
| RM152  | 8    | 677616                       | GAAACCACCACACCTCACCG   | CCGTAGACCTTCTTGAAGTAG        | 53                 |
| RM25   | 8    | 4372113                      | GGAAAGAATGATCTTTTCATGG | CTACCATCAAAACCAATGTTC        | 53                 |
| RM44   | 8    | 11753077                     | ACGGGCAATCCGAACAACC    | TCGGGAAAACCTACCCTACC         | 53                 |
| RM284  | 8    | 21012223                     | ATCTCTGATACTCCATCCATCC | CCTGTACGTTGATCCGAAGC         | 55                 |
| RM433  | 8    | 25691233                     | TGCGCTGAACTAAACACAGC   | AGACAAACCTGGCCATTAC          | 53                 |
| RM447  | 8    | 26416867                     | CCCTTGCTGTCTCCTCTC     | ACGGGCTTCTTCTCCTTCTC         | 55                 |
| RM316  | 9    | 1022645                      | CTAGTTGGGCATACGATGGC   | ACGCTTATATGTTACGTCAAC        | 55                 |
| RM105  | 9    | 12496919                     | GTCGTCGACCCATCGGAGCCAC | TGGTCGAGGTGGGGATCGGGTC       | 63                 |
| RM215  | 9    | 20837148                     | CAAAATGGAGCAGCAAGAGC   | TGAGCACCTCCTTCTCTGTAG        | 55                 |
| RM474  | 10   | 1798783                      | AAGATGTACGGGTGGCATTC   | TATGAGCTGGTGAGCAATGG         | 55                 |
| RM271  | 10   | 16202474                     | TCAGATCTACAATTCCATCC   | TCGGTGAGACCTAGAGAGCC         | 55                 |
| RM171  | 10   | 18614310                     | AACGCGAGGACACGTACTTAC  | ACGAGATACGTACGCCTTTG         | 55                 |
| RM484  | 10   | 20630348                     | TCTCCCTCCTCACCATTGTC   | TGCTGCCCTCTCTCTCTCTC         | 55                 |
| RM552  | 11   | 4836203                      | CGCAGTTGTGGATTTCAAGTG  | TGCTCAACGTTTGACTGTCC         | 55                 |
| RM536  | 11   | 8963471                      | TCTCTCCTCTTGTTTGGCTC   | ACACACCAACACGACCACAC         | 55                 |
| RM287  | 11   | 16733868                     | TTCCCTGTTAAGAGAGAAATC  | GTGTATTTGGTGAAAGCAAC         | 55                 |
| RM144  | 11   | 28158704                     | TGCCCTGGCGCAAATTTGATCC | GCTAGAGGAGATCAGATGGTAGTGCATG | 57                 |
| RM19   | 12   | 2432429                      | CAAAAACAGAGCAGATGAC    | CTCAAGATGGACGCCAAGA          | 55                 |
| RM277  | 12   | 18286130                     | CGGTCAAATCATCACCTGAC   | CAAGGCTTGCAAGGGAAG           | 55                 |

**Supplementary Table S3.** Marker statistics based on 44 SSR markers

| No.  | Marker | Chromosome | Allele richness | AF <sub>m</sub> | A <sub>e</sub> | H <sub>e</sub> | PIC   | Rare alleles |
|------|--------|------------|-----------------|-----------------|----------------|----------------|-------|--------------|
| 1    | RM495  | 1          | 2               | 0.749           | 1.60           | 0.376          | 0.306 | -            |
| 2    | RM 1   | 1          | 3               | 0.744           | 1.71           | 0.414          | 0.378 | -            |
| 3    | RM 283 | 1          | 2               | 0.821           | 1.42           | 0.294          | 0.252 | -            |
| 4    | RM259  | 1          | 3               | 0.500           | 2.05           | 0.513          | 0.395 | -            |
| 5    | RM5    | 1          | 6               | 0.479           | 3.03           | 0.670          | 0.620 | 1            |
| 6    | RM237  | 1          | 3               | 0.842           | 1.37           | 0.272          | 0.247 | -            |
| 7    | RM154  | 2          | 3               | 0.557           | 2.39           | 0.582          | 0.512 | -            |
| 8    | RM452  | 2          | 2               | 0.649           | 1.84           | 0.456          | 0.353 | -            |
| 9    | RM489  | 3          | 3               | 0.561           | 2.03           | 0.507          | 0.396 | -            |
| 10   | OSR13  | 3          | 2               | 0.960           | 1.08           | 0.077          | 0.074 | -            |
| 11   | RM338  | 3          | 2               | 0.518           | 2.00           | 0.499          | 0.376 | -            |
| 12   | RM55   | 3          | 2               | 0.958           | 1.09           | 0.081          | 0.078 | -            |
| 13   | RM514  | 3          | 2               | 0.811           | 1.44           | 0.306          | 0.260 | -            |
| 14   | RM307  | 4          | 2               | 0.931           | 1.15           | 0.128          | 0.120 | -            |
| 15   | RM507  | 5          | 2               | 0.916           | 1.18           | 0.153          | 0.142 | -            |
| 16   | RM413  | 5          | 4               | 0.632           | 1.97           | 0.492          | 0.406 | 1            |
| 17   | RM161  | 5          | 3               | 0.692           | 1.75           | 0.429          | 0.342 | 1            |
| 18   | RM178  | 5          | 3               | 0.832           | 1.42           | 0.294          | 0.275 | -            |
| 19   | RM334  | 5          | 6               | 0.455           | 2.92           | 0.658          | 0.601 | -            |
| 20   | RM510  | 6          | 2               | 0.801           | 1.47           | 0.318          | 0.268 | -            |
| 21   | RM454  | 6          | 2               | 0.989           | 1.02           | 0.021          | 0.021 | -            |
| 22   | RM162  | 6          | 4               | 0.526           | 2.25           | 0.555          | 0.462 | 1            |
| 23   | RM11   | 7          | 3               | 0.461           | 2.70           | 0.630          | 0.556 | -            |
| 24   | RM455  | 7          | 2               | 0.864           | 1.31           | 0.234          | 0.207 | -            |
| 25   | RM118  | 7          | 2               | 0.519           | 2.00           | 0.499          | 0.376 | -            |
| 26   | RM408  | 8          | 2               | 0.546           | 1.98           | 0.496          | 0.374 | -            |
| 27   | RM152  | 8          | 4               | 0.485           | 2.26           | 0.558          | 0.461 | -            |
| 28   | RM25   | 8          | 3               | 0.515           | 2.39           | 0.582          | 0.499 | -            |
| 29   | RM44   | 8          | 4               | 0.647           | 2.08           | 0.519          | 0.466 | 1            |
| 30   | RM284  | 8          | 2               | 0.981           | 1.04           | 0.037          | 0.037 | -            |
| 31   | RM433  | 8          | 2               | 0.992           | 1.02           | 0.017          | 0.017 | 1            |
| 32   | RM447  | 8          | 4               | 0.519           | 2.44           | 0.590          | 0.513 | -            |
| 33   | RM316  | 9          | 2               | 0.618           | 1.89           | 0.472          | 0.362 | -            |
| 34   | RM105  | 9          | 2               | 0.788           | 1.50           | 0.334          | 0.279 | -            |
| 35   | RM215  | 9          | 3               | 0.674           | 1.96           | 0.491          | 0.441 | -            |
| 36   | RM474  | 10         | 11              | 0.379           | 3.26           | 0.693          | 0.640 | 4            |
| 37   | RM171  | 10         | 3               | 0.532           | 2.03           | 0.506          | 0.388 | 1            |
| 38   | RM484  | 10         | 2               | 0.788           | 1.50           | 0.334          | 0.279 | -            |
| 39   | RM552  | 11         | 5               | 0.879           | 1.28           | 0.221          | 0.213 | -            |
| 40   | RM536  | 11         | 3               | 0.614           | 2.02           | 0.504          | 0.415 | -            |
| 41   | RM287  | 11         | 3               | 0.777           | 1.59           | 0.370          | 0.339 | -            |
| 42   | RM144  | 11         | 4               | 0.588           | 2.05           | 0.511          | 0.414 | -            |
| 43   | RM19   | 12         | 5               | 0.798           | 1.52           | 0.342          | 0.315 | 2            |
| 44   | RM277  | 12         | 2               | 0.746           | 1.61           | 0.379          | 0.308 | -            |
| Mean |        |            | 3.091           | 0.696           |                | 0.396          | 0.336 |              |

F<sub>m</sub>= major allele frequency, A<sub>e</sub> = effective number of alleles; GD = gene diversity, H<sub>e</sub> = expected heterozygosity, PIC = polymorphic information content

Obtained from 43 countries spread across six continents, tropical *japonica* lines belonged to 45 countries

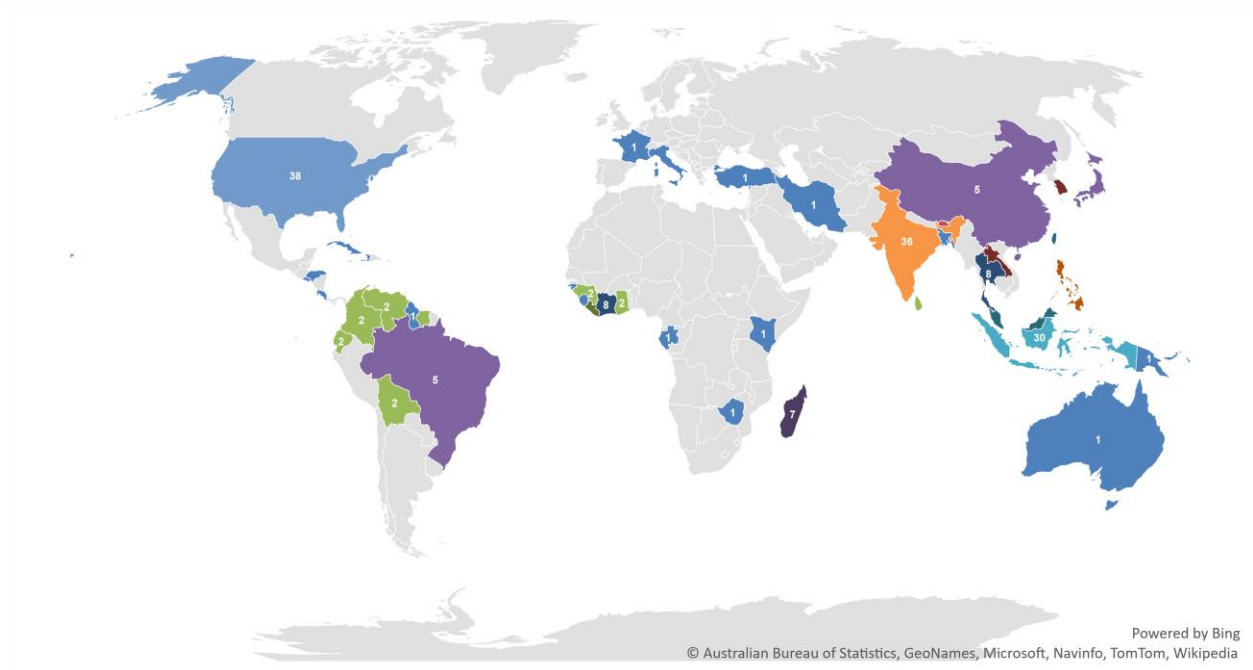

**Supplementary figure S2.** Frequency distribution of agromorphologic traits among the tropical *japonica* accessions used in the study. All the traits showed normal distribution, but two traits number of unfilled spikelets and spikelet fertility showed a skewed distribution.

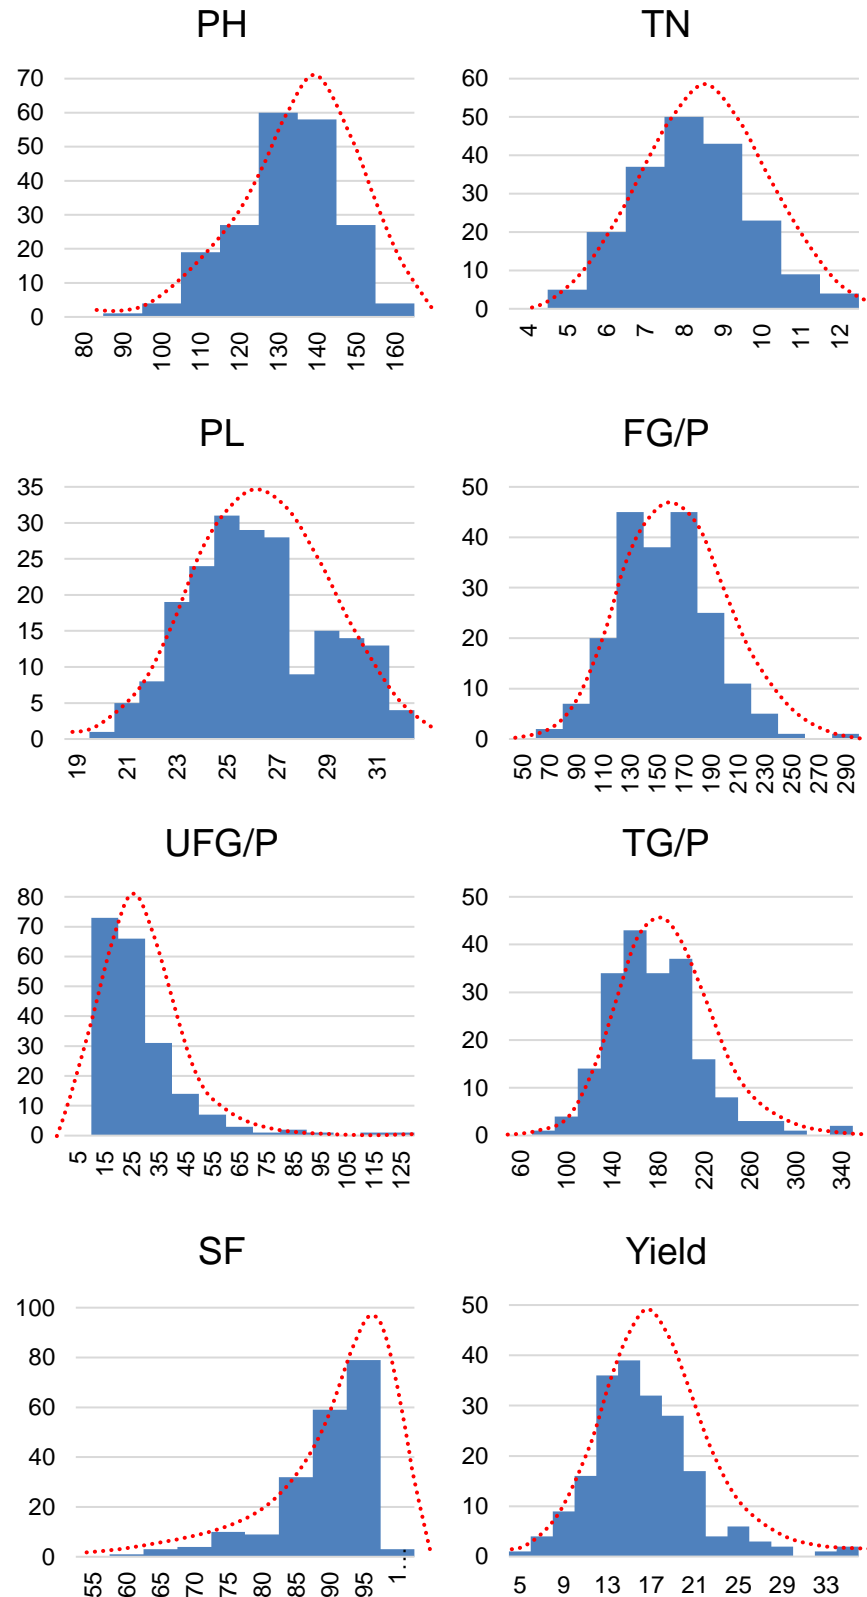

**Supplementary Figure S3.** Frequency of different allelic classes among the test panel comprising of tropical japonica and check varieties

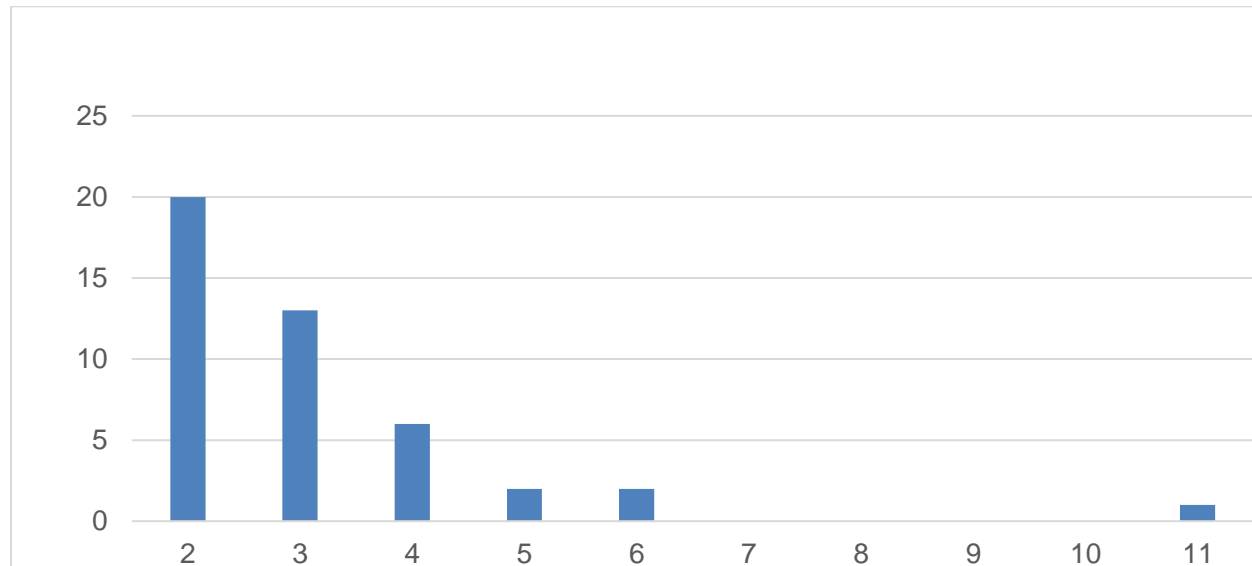

Supplement: s1 [file s1]
